# Supplementary material for: Double decoupling effectiveness of water consumption and wastewater discharge in China’s textile industry based on water footprint theory
Source: PeerJ. 2019 May 24;7:e6937. doi: 10.7717/peerj.6937 (PMC6536152; doi:10.7717/peerj.6937)
Supplement: Supplemental Information 3 [file peerj-07-6937-s003.xls]

## Sheet: Sheet1
Water Footprint of China's Textile Industary
Year	Blue WF/(Gt Water/a)	Gary WF/(Gt Water/a)	WF/(Gt Water/a)
2001	6.27	4.05	10.33
2002	7.16	3.81	10.98
2003	6.44	3.59	10.03
2004	7.65	4.08	11.73
2005	8.8	4.24	13.04
2006	8.55	4.48	13.03
2007	9.43	4.61	14.04
2008	9.27	4.34	13.61
2009	9.24	4.52	13.76
2010	9.46	4.39	13.85
2011	7.89	4.61	12.51
2012	8.06	4.4	10.46
2013	7.85	4.29	12.14
2014	8.65	3.98	12.62
2015	8.49	3.7	12.19
